# Supplementary material for: Subjective Preference and Visual Attention to the Attributes of Ornamental Plants in Urban Green Space: An Eye-Tracking Study
Source: MDPI journal article supplement (doi:10.3390/f13111871), 2022-11-09
Supplement: s1 [file s1]

Archive with 1 entries (1 files):
- forests-2013440-supplementary.pdf
