# Supplementary material for: Subjective Preference and Visual Attention to the Attributes of Ornamental Plants in Urban Green Space: An Eye-Tracking Study
Source: MDPI journal article supplement (doi:10.3390/f13111871), 2022-11-09
Supplement: s1 [file s1 › forests-2013440-supplementary.pdf]

## Supplementary Figure S1

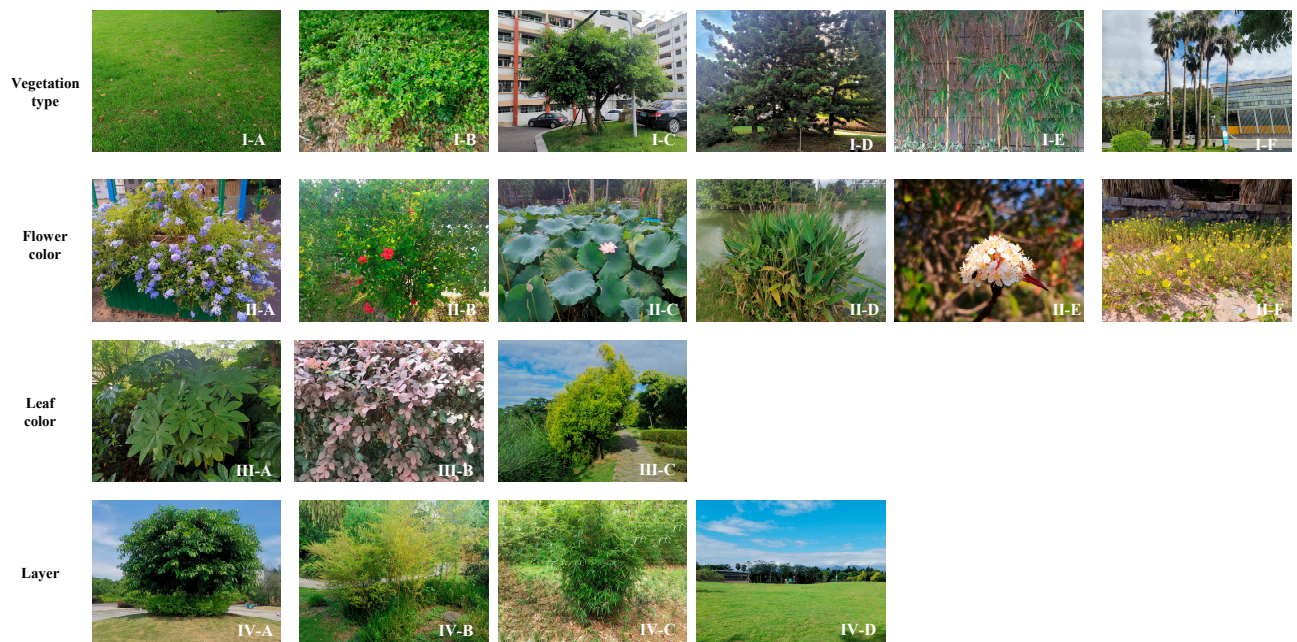

**Figure S1.** The attributes of ornamental plants were subdivided into four categories based on vegetation type, flower color, leaf color, and layer. I-A–I-F represent grassland, shrub, broad-leaf tree, coniferous tree, bamboo, and palm, respectively; II-A–II-F represent blue, red, pink, purple, white, and yellow flowers, respectively; III-A–III-C represent green, yellow, and red leaves, respectively; IV-A–IV-D represent tree + shrub + grass, shrub + grass, shrub, and grass, respectively.
